# Supplementary material for: A systematic study of the variation of tetrathiafulvalene (TTF), TTF+˙ and TTF2+reaction pathways with water in the presence and absence of light
Source: Royal Society of Chemistry journal article supplement (doi:10.1039/c4ra08038f), 2014-01-01
Supplement: c4ra08038f1.pdf [file c4ra08038f1.pdf]

## Supporting Information

### **A systematic study of the variation of tetrathiafulvalene (TTF), TTF<sup>•+</sup> and TTF<sup>2+</sup> reaction pathways with water in the presence and absence of light**

Shaimaa M. Adeel,<sup>[a]</sup> Qi Li,<sup>[a]</sup> Ayman Nafady,<sup>[a,b]</sup> Chuan Zhao,<sup>[a,c]</sup> Amal I. Siriwardana,<sup>[a,d]</sup>  
Alan M. Bond\*<sup>[a]</sup> and Lisandra L Martin\*<sup>[a]</sup>

<sup>[a]</sup> School of Chemistry, Monash University, Clayton, Victoria 3800, Australia

\* To whom correspondence should be addressed, Email: [Lisa.Martin@monash.edu](mailto:Lisa.Martin@monash.edu),  
[Alan.Bond@monash.edu](mailto:Alan.Bond@monash.edu)

<sup>[b]</sup> *Current Address:* King Saud University, College of Science, Department of Chemistry, PO Box 2455, Riyadh 11451, Saudi Arabia

<sup>[c]</sup> *Current Address:* School of Chemistry, The University of New South Wales, Sydney, NSW 2052, Australia

<sup>[d]</sup> *Current Address:* Tecnalia, Parque Tecnológico de San Sebastián, Mikeletegi Pasealekua, 2, E-20009 Donostia-San Sebastián, Gipuzkoa, Spain

**Table S1** Cyclic voltammetric parameters (vs. Fc/Fc<sup>+</sup>) obtained for the oxidation of 1 mM TTF with a 3 mm diameter GC electrode using a scan rate of 100 mV s<sup>-1</sup> in acetonitrile (0.1 M Bu<sub>4</sub>NPF<sub>6</sub>) in the absence and presence of 10 % water.

| Water%<br>(v/v) | TTF <sup>0/+</sup> |              |          |                 | TTF <sup>+2/+</sup> |              |          |                 |
|-----------------|--------------------|--------------|----------|-----------------|---------------------|--------------|----------|-----------------|
|                 | $E_p^{ox1}$        | $E_p^{red1}$ | $E_{m1}$ | $\Delta E_{p1}$ | $E_p^{ox2}$         | $E_p^{red2}$ | $E_{m2}$ | $\Delta E_{p2}$ |
|                 | mV                 | mV           | mV       | mV              | mV                  | mV           | mV       | mV              |
| 0               | -34                | -114         | -74      | 80              | 350                 | 272          | 311      | 78              |
| 10              | -50                | -137         | -94      | 87              | 325                 | 245          | 285      | 80              |

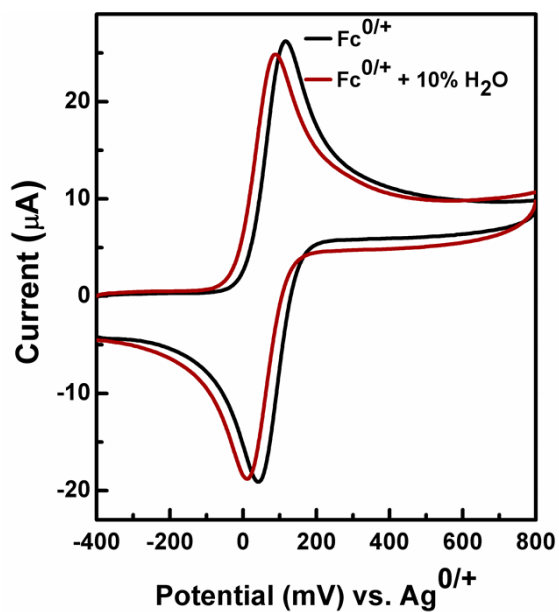

**Figure S1** Cyclic voltammograms for the oxidation of 1 mM Ferrocene (Fc) in acetonitrile (0.1 M Bu<sub>4</sub>NPF<sub>6</sub>) obtained with a 3 mm diameter GC electrode using a scan rate of 100 mV s<sup>-1</sup> in the absence and presence of 10% water.

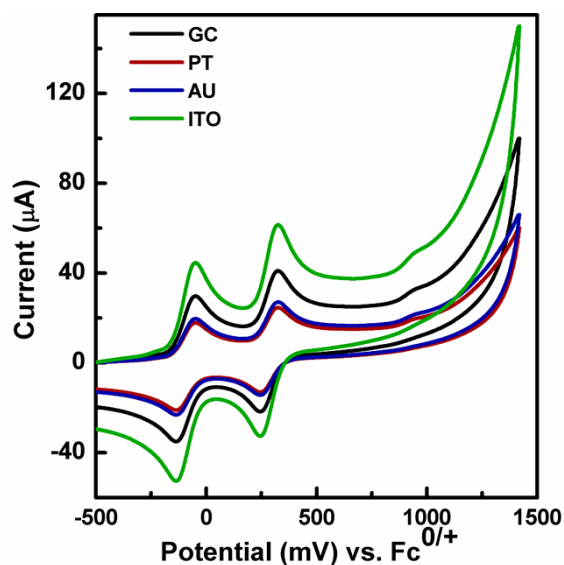

**Figure S2** Cyclic voltammograms for the oxidation of 1mM TTF in acetonitrile/water (90:10%) (0.1 M  $\text{Bu}_4\text{NPF}_6$ ) obtained with GC, Au, Pt and ITO electrodes using a scan rate of  $100 \text{ mV s}^{-1}$ .

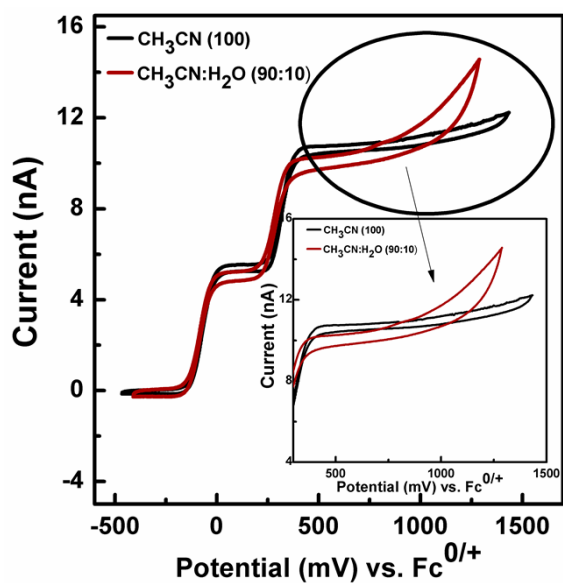

**Figure S3** Steady-state voltammograms obtained with a  $12 \mu\text{m}$  diameter carbon fiber microdisc electrode using a scan rate of  $20 \text{ mV s}^{-1}$  for the oxidation of 1 mM TTF in acetonitrile (0.1 M  $\text{Bu}_4\text{NPF}_6$ ) in the absence and in the presence of 10% water.

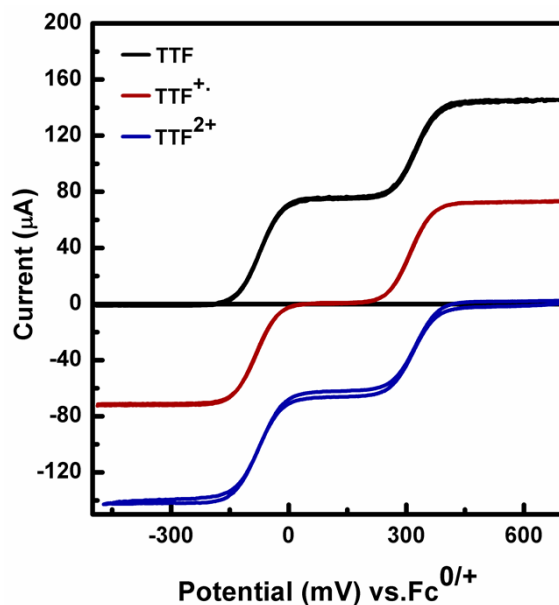

**Figure S4** RDE voltammograms obtain with a 3 mm diameter GC electrode using a rotation rate of 1000 rpm and scan rate of  $20 \text{ mV s}^{-1}$  for 1 mM TTF, and  $\text{TTF}^{+}$  and  $\text{TTF}^{2+}$  generated by bulk electrolysis at 120 and 620 mV vs.  $\text{Fc}^{0/+}$  respectively in acetonitrile (0.1 M  $\text{Bu}_4\text{NPF}_6$ ) inside a dry box. During this bulk electrolysis experiment, the initially pale-yellow TTF solution changed to dark red  $\text{TTF}^{+}$ , which upon further oxidation at 620 mV generates a light-yellow  $\text{TTF}^{2+}$  solution; thus the oxidation of TTF to  $\text{TTF}^{2+}$  occurs in two steps. The position of zero current in the steady state RDE voltammogram confirms that complete oxidation of TTF to  $\text{TTF}^{2+}$  is achieved in the absence of oxygen and water under dry box conditions.

**Table S2** Cyclic voltammetric parameters (vs. Fc/Fc<sup>+</sup>) obtained for the oxidation and reduction of 1mM TTF<sup>+/2+</sup> at a 3 mm diameter GC electrode in acetonitrile and mixed acetonitrile/water (90:10%, v/v) solvent media (0.1 M Bu<sub>4</sub>NPF<sub>6</sub>) in the dark and after irradiation with white light ( $\lambda = 275-750$  nm).

| Water % (v/v)    | TTF <sup>0/+</sup> |              |          |                 | TTF <sup>+/2+</sup> |              |          |                 | HTTF <sup>+</sup> |
|------------------|--------------------|--------------|----------|-----------------|---------------------|--------------|----------|-----------------|-------------------|
|                  | $E_p^{ox1}$        | $E_p^{red1}$ | $E_{m1}$ | $\Delta E_{p1}$ | $E_p^{ox2}$         | $E_p^{red2}$ | $E_{m2}$ | $\Delta E_{p2}$ | $E_p^{ox3}$       |
|                  | mV                 | mV           | mV       | mV              | mV                  | mV           | mV       | mV              | mV                |
| 0                | -33                | -110         | -71      | 77              | 350                 | 272          | 311      | 78              | -                 |
| 10 (dark)        | -57                | -134         | -95      | 77              | 324                 | 246          | 285      | 78              | -                 |
| 10 (white light) | -57                | -134         | -95      | 77              | 318                 | 246          | 282      | 72              | 1024              |

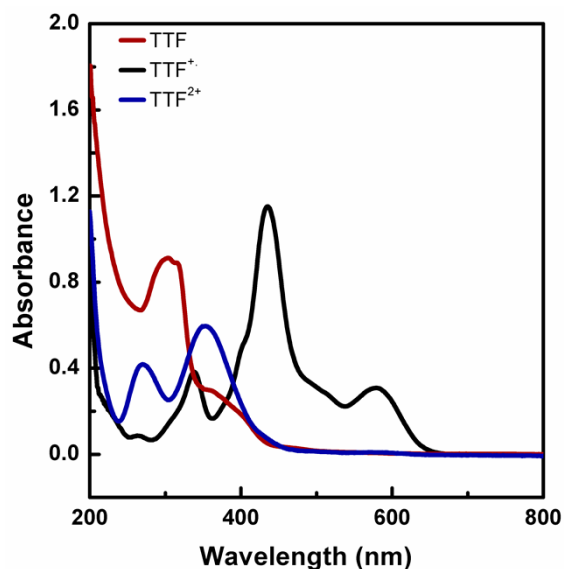

**Figure S5** UV-visible spectra of 1 mM TTF, TTF<sup>+</sup> and TTF<sup>2+</sup> in acetonitrile (0.1 M Bu<sub>4</sub>NPF<sub>6</sub>).

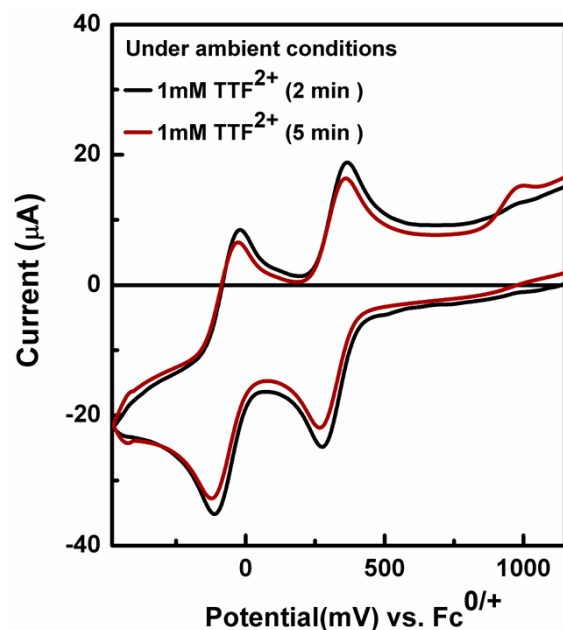

**Figure S6** Voltammograms obtained at a 3 mm diameter GC electrode at a scan rate of 100 mV s<sup>-1</sup> for 1mM TTF<sup>2+</sup> generated by bulk electrolysis in acetonitrile (0.1 M Bu<sub>4</sub>NPF<sub>6</sub>) under dry box conditions followed by 2 min and 5 min exposure to ambient conditions (outside dry box).

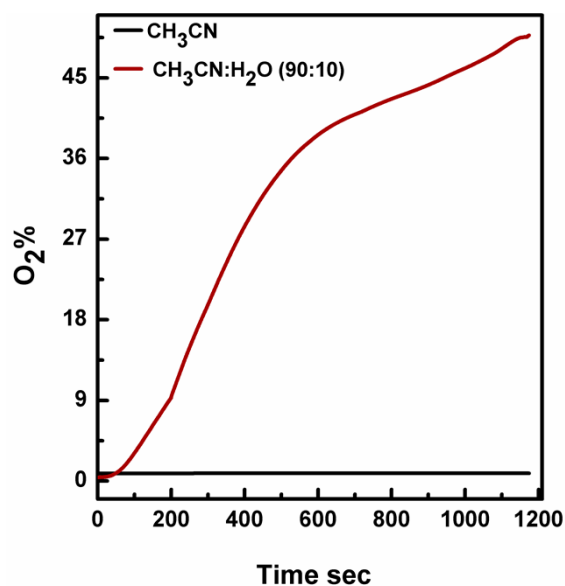

**Figure S7** Oxygen percentages as a function of time for 1 mM TTF<sup>2+</sup> in acetonitrile (0.1 M Bu<sub>4</sub>NPF<sub>6</sub>) with or without added water under nitrogen atmosphere with exposure to white light.
